# Supplementary material for: Digital sorting of complex tissues for cell type-specific gene expression profiles
Source: Springer Nature journal article supplement (doi:10.1186/1471-2105-14-89), 2013-03-07
Supplement: 12859_2012_5794_MOESM2_ESM.pdf [file 12859_2012_5794_MOESM2_ESM.pdf]

(A)

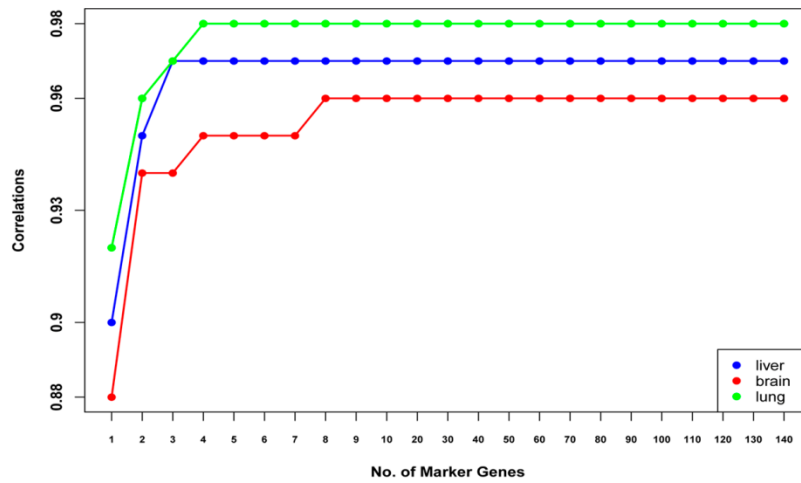

(B)

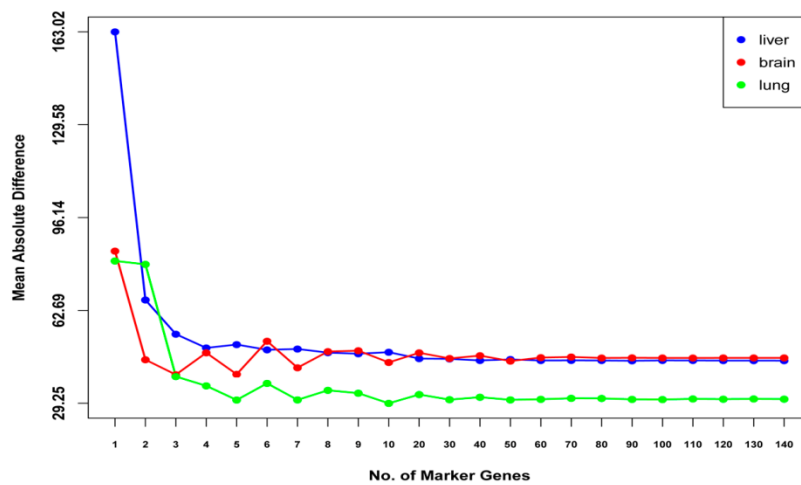

Marker genes were randomly selected from the TIGER list at different sizes, for 100 times on each size. In each repetition, the estimated weight matrix using the sampled marker genes was then used to estimate the cell-type specific signals. Correlation and mean absolute difference (MAD) between the original and estimated signals were measured. (A) shows the average correlation and (B) shows the average MAD from the 100 iterations using different number of marker genes.
