# Supplementary material for: Digital sorting of complex tissues for cell type-specific gene expression profiles
Source: Springer Nature journal article supplement (doi:10.1186/1471-2105-14-89), 2013-03-07

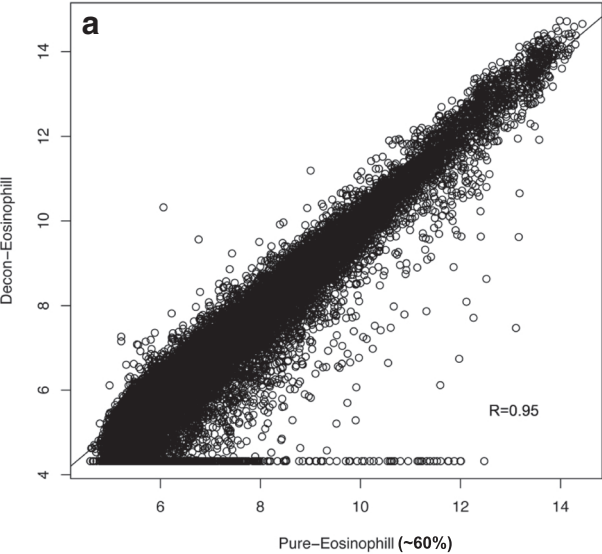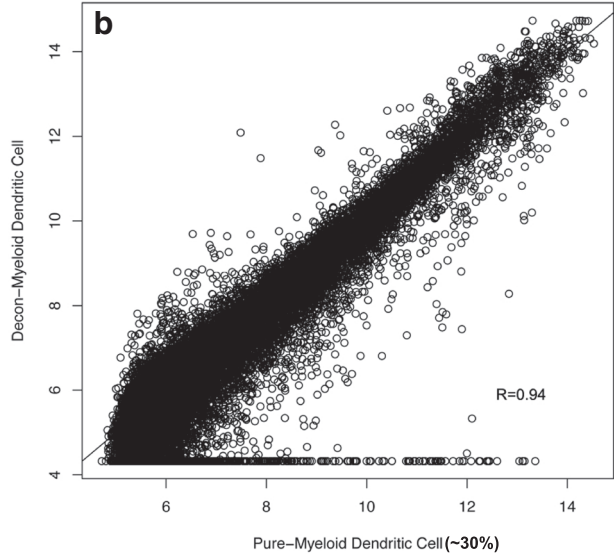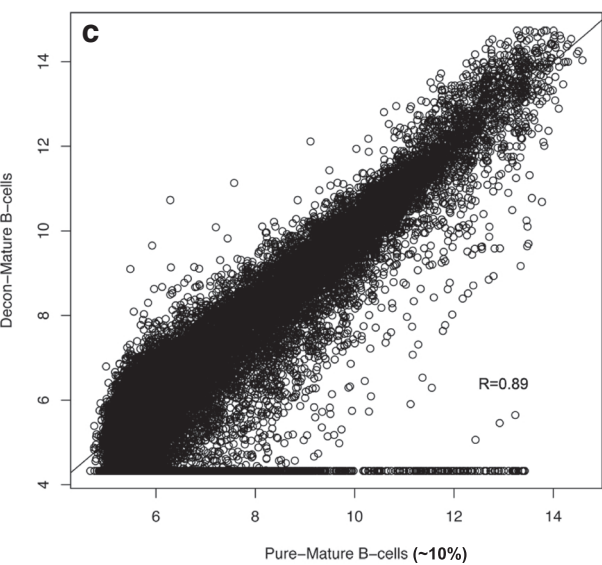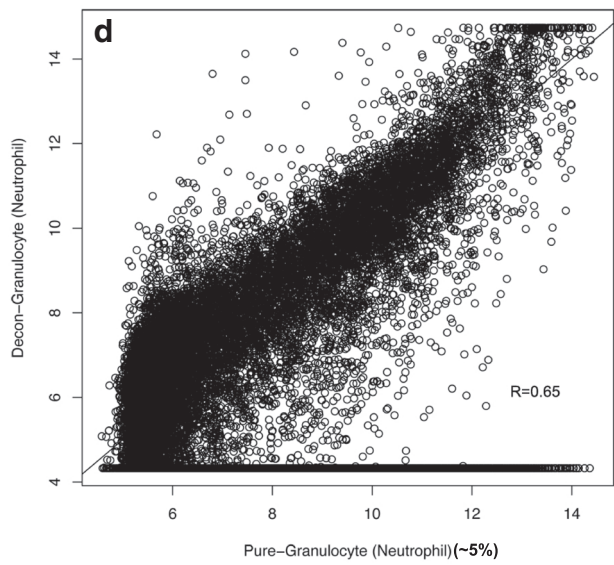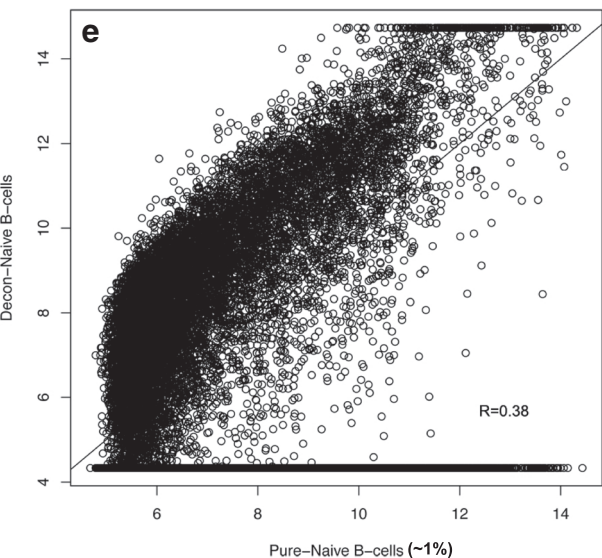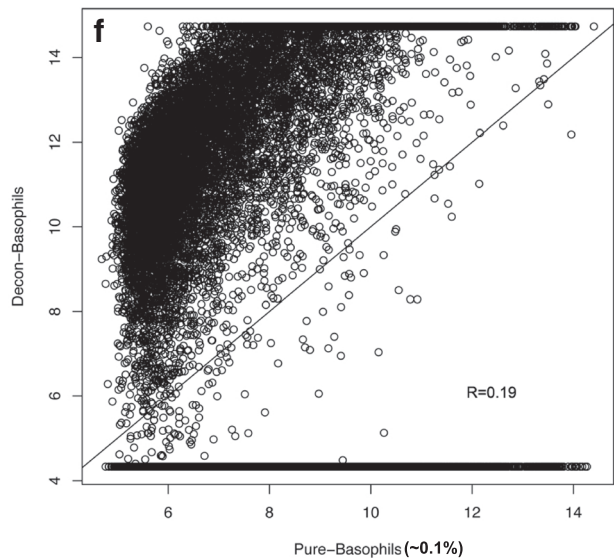

Supplement: 12859_2012_5794_MOESM11_ESM.pdf [file 12859_2012_5794_MOESM11_ESM.pdf]
